# Supplementary material for: Bodiniosides S–Y, Seven New Triterpenoid Saponins from Elsholtzia bodinieri and Their Anti-Influenza Activities
Source: MDPI journal article supplement (doi:10.3390/molecules26216535), 2021-10-29
Supplement: s1 [file s1]

## SUPPLEMENTARY MATERIAL

### **Bodinosides S – Y, Seven New Triterpenoid Saponins from *Elsholtzia bodinieri* and Their Anti-Influenza Activities**

Lin-Yao Yang<sup>1†</sup>, Jiang-Chao Du<sup>1†</sup>, Rong-Tao Li<sup>1</sup>, Fei Yu<sup>2</sup>, and Jin-Dong Zhong<sup>1\*</sup>

<sup>1</sup>Faculty of Life Science and Technology, Kunming University of Science and Technology, Kunming, 650500, China; E-Mails: linyaoyang0808@163.com (L.-Y. Y); dujiangchao2021@163.com (J.-C. D); rongtaolikm@163.com (R.-T. L);

<sup>2</sup>Medical School, Kunming University of Science and Technology, Kunming, Yunnan, China; E-Mails: feiyuz8@163.com (F. Y)

\* Correspondence: jindongzhongkm@163.com; Tel: +86-871-65916009

†These authors contributed equally to this work.

#### **Abstract**

Investigation of the n-BuOH extract of the aerial parts of *Elsholtzia bodinieri* led to the isolation of seven new triterpenoid saponins, Bodinosides S - Y (**1** – **7**, resp.). Their structures were elucidated on the basis of spectroscopic techniques, including HSQC, HSBC, and HSQC-TOCSY experiments, together with acid hydrolysis and GC analysis. Anti-influenza activities of compounds **1** - **7** were evaluated against A/WSN/33/2009 (H1N1) virus in MDCK cells. As the results, compounds **2** and **5** exhibited potent anti-influenza activities against A/WSN/33/2009 (H1N1), with inhibition rate of 35.33% and 24.08%, respectively.

**Keywords:** *Elsholtzia bodinieri*; triterpenoid saponins; anti-influenza virus activities; Bodinosides S – Y;

# List of Contents

|            |                                                                               |
|------------|-------------------------------------------------------------------------------|
| Figure S1  | Key HMBC correlation of compound <b>1</b>                                     |
| Figure S2  | $^1\text{H}$ NMR spectrum of compound <b>1</b> (600 MHz, pyridine- $d_5$ )    |
| Figure S3  | $^{13}\text{C}$ NMR spectrum of compound <b>1</b> (150 MHz, pyridine- $d_5$ ) |
| Figure S4  | HSQC spectrum of compound <b>1</b>                                            |
| Figure S5  | HMBC spectrum of compound <b>1</b>                                            |
| Figure S6  | HRESIMS spectrum of compound <b>1</b>                                         |
| Figure S7  | Key HMBC correlation of compound <b>2</b>                                     |
| Figure S8  | $^1\text{H}$ NMR spectrum of compound <b>2</b> (600 MHz, pyridine- $d_5$ )    |
| Figure S9  | $^{13}\text{C}$ NMR spectrum of compound <b>2</b> (150 MHz, pyridine- $d_5$ ) |
| Figure S10 | HSQC spectrum of compound <b>2</b>                                            |
| Figure S11 | HMBC spectrum of compound <b>2</b>                                            |
| Figure S12 | HRESIMS spectrum of compound <b>2</b>                                         |
| Figure S13 | Key HMBC correlation of compound <b>3</b>                                     |
| Figure S14 | $^1\text{H}$ NMR spectrum of compound <b>3</b> (600 MHz, pyridine- $d_5$ )    |
| Figure S15 | $^{13}\text{C}$ NMR spectrum of compound <b>3</b> (150 MHz, pyridine- $d_5$ ) |
| Figure S16 | HSQC spectrum of compound <b>3</b>                                            |
| Figure S17 | HMBC spectrum of compound <b>3</b>                                            |
| Figure S18 | HRESIMS spectrum of compound <b>3</b>                                         |
| Figure S19 | Key HMBC correlation of compound <b>4</b>                                     |
| Figure S20 | $^1\text{H}$ NMR spectrum of compound <b>4</b> (600 MHz, pyridine- $d_5$ )    |
| Figure S21 | $^{13}\text{C}$ NMR spectrum of compound <b>4</b> (150 MHz, pyridine- $d_5$ ) |
| Figure S22 | HSQC spectrum of compound <b>4</b>                                            |
| Figure S23 | HMBC spectrum of compound <b>4</b>                                            |
| Figure S24 | HRESIMS spectrum of compound <b>4</b>                                         |
| Figure S25 | Key HMBC correlation of compound <b>5</b>                                     |
| Figure S26 | $^1\text{H}$ NMR spectrum of compound <b>5</b> (600 MHz, pyridine- $d_5$ )    |
| Figure S27 | $^{13}\text{C}$ NMR spectrum of compound <b>5</b> (150 MHz, pyridine- $d_5$ ) |
| Figure S28 | HSQC spectrum of compound <b>5</b>                                            |
| Figure S29 | HMBC spectrum of compound <b>5</b>                                            |
| Figure S30 | HRESIMS spectrum of compound <b>5</b>                                         |
| Figure S31 | Key HMBC correlation of compound <b>6</b>                                     |
| Figure S32 | $^1\text{H}$ NMR spectrum of compound <b>6</b> (600 MHz, pyridine- $d_5$ )    |
| Figure S33 | $^{13}\text{C}$ NMR spectrum of compound <b>6</b> (150 MHz, pyridine- $d_5$ ) |
| Figure S34 | HSQC spectrum of compound <b>6</b>                                            |
| Figure S35 | HMBC spectrum of compound <b>6</b>                                            |
| Figure S36 | HRESIMS spectrum of compound <b>6</b>                                         |
| Figure S37 | Key HMBC correlation of compound <b>7</b>                                     |
| Figure S38 | $^1\text{H}$ NMR spectrum of compound <b>7</b> (600 MHz, pyridine- $d_5$ )    |
| Figure S39 | $^{13}\text{C}$ NMR spectrum of compound <b>7</b> (150 MHz, pyridine- $d_5$ ) |
| Figure S40 | HSQC spectrum of compound <b>7</b>                                            |
| Figure S41 | HMBC spectrum of compound <b>7</b>                                            |
| Figure S42 | HRESIMS spectrum of compound <b>7</b>                                         |

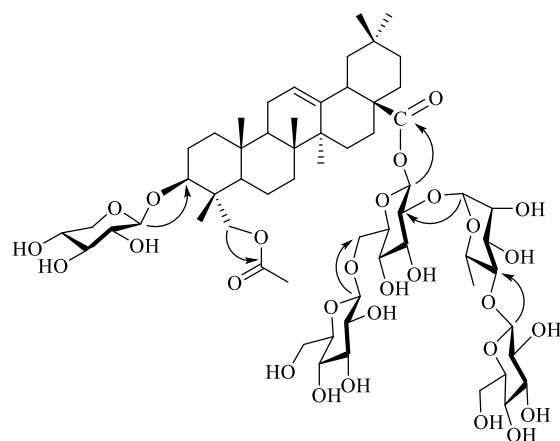

Figure S1 Key HMBC correlation of compound **1**

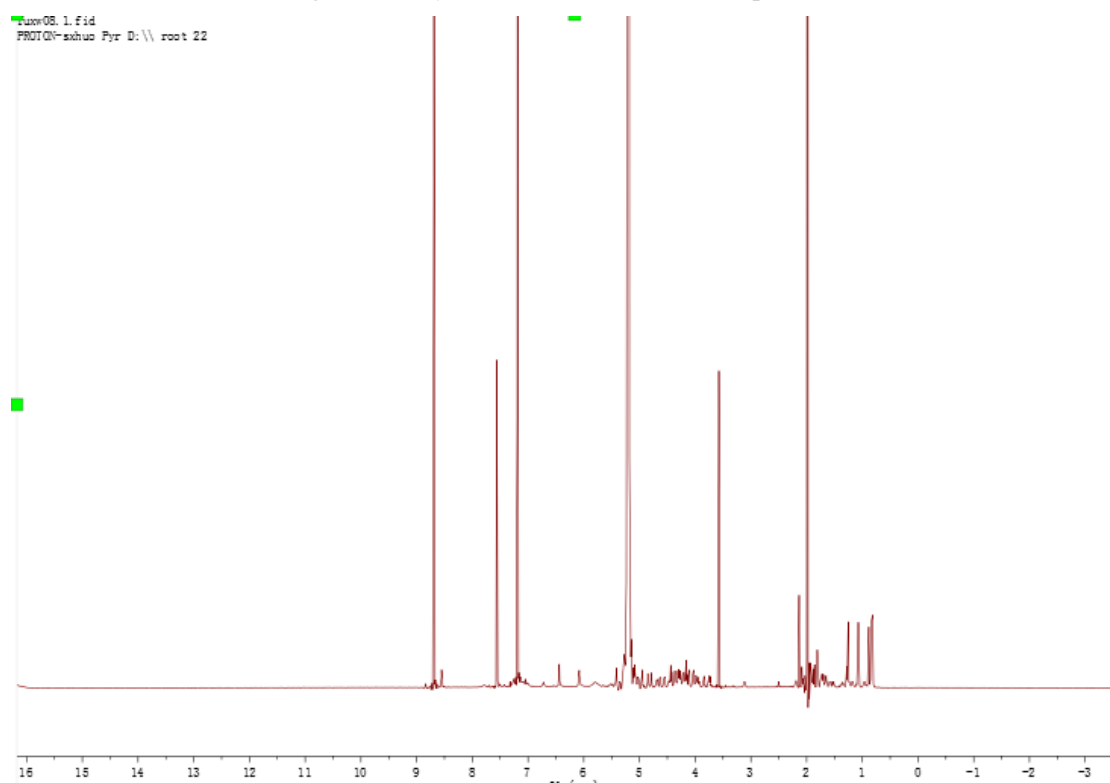

Figure S2 <sup>1</sup>H NMR spectrum of compound **1** (600 MHz, pyridine-*d*<sub>5</sub>)

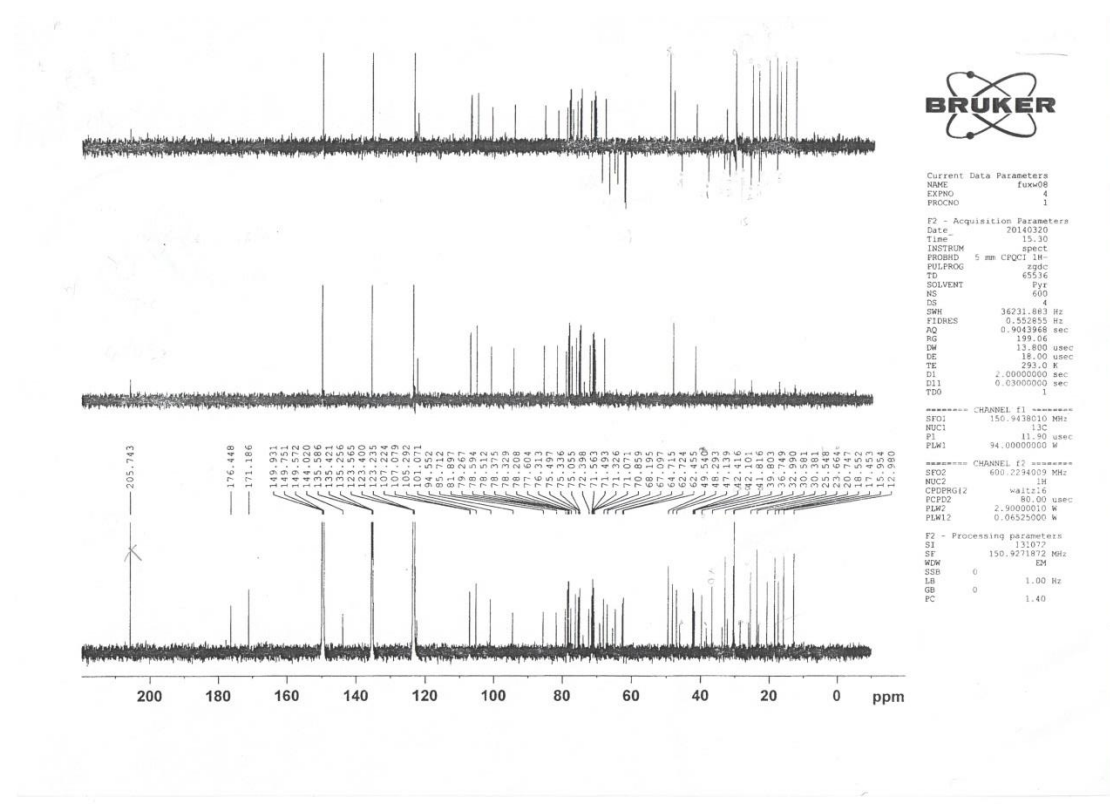

Figure S3  $^{13}\text{C}$  NMR spectrum of compound **1** (150 MHz, pyridine- $d_5$ )

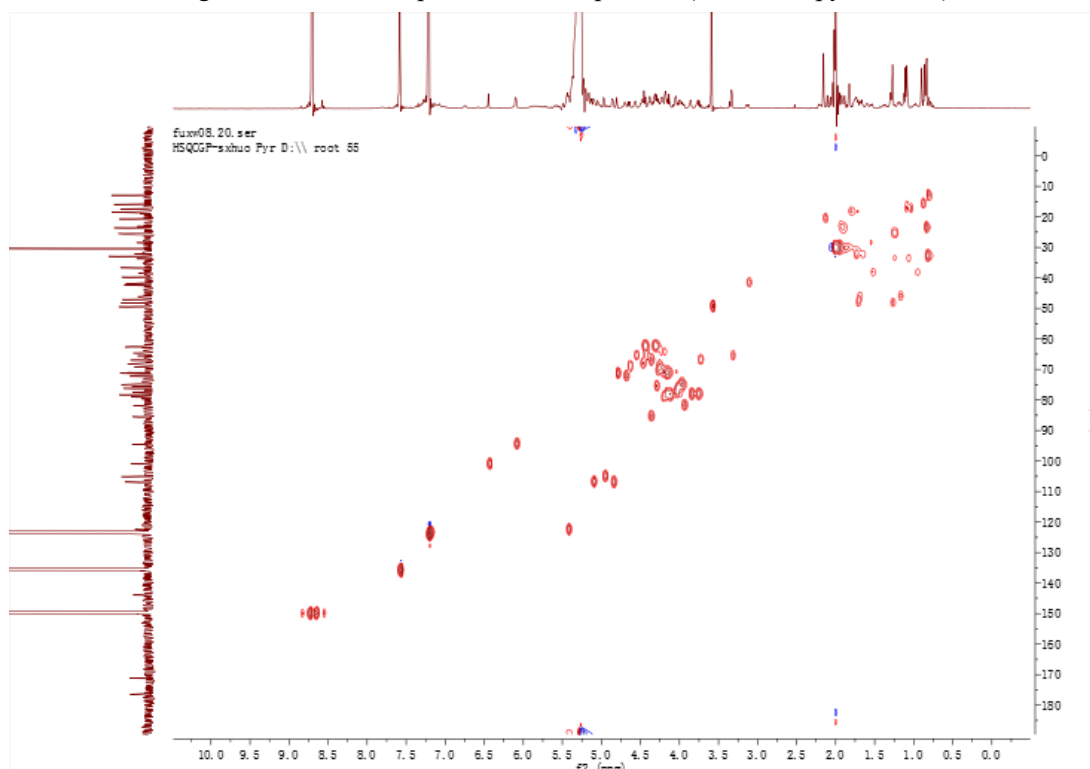

Figure S4 HSQC spectrum of compound **1**

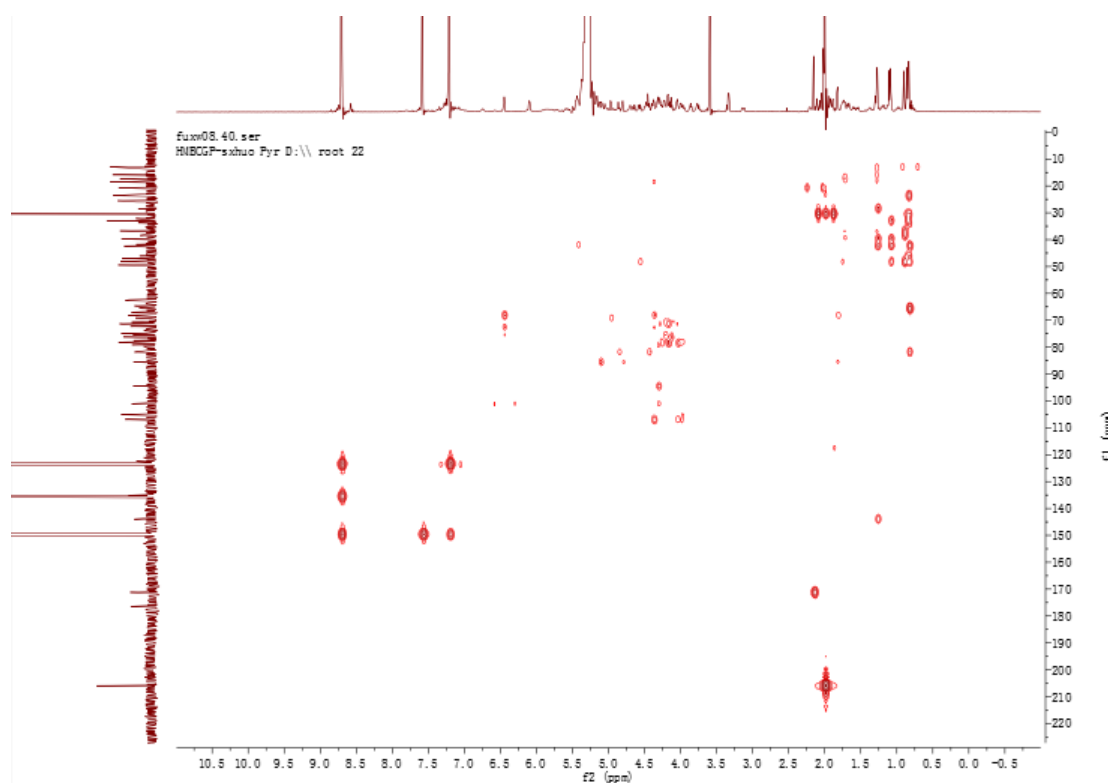

Figure S5 HMBC spectrum of compound **1**

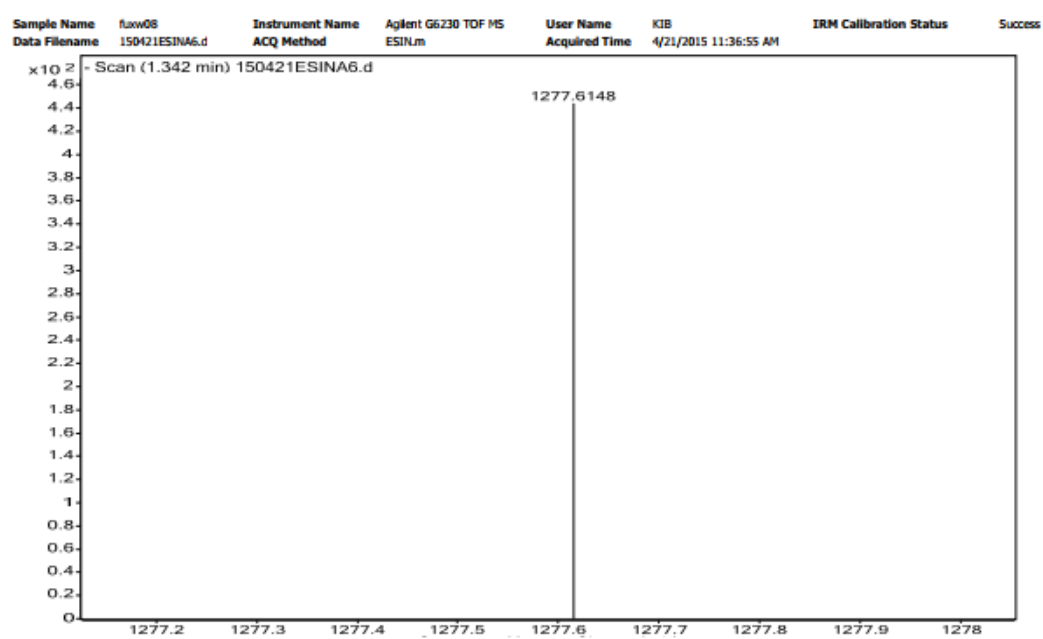

Figure S6 HRESIMS spectrum of compound **1**

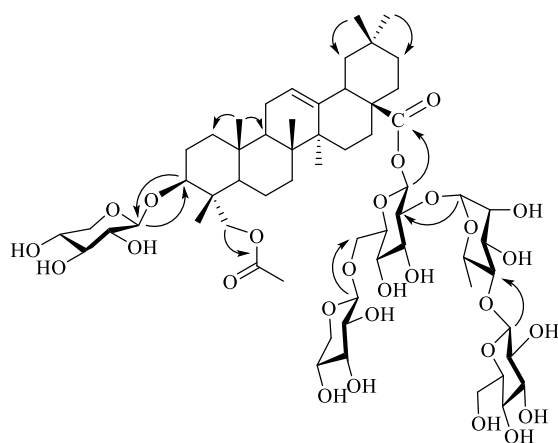

Figure S7 Key HMBC correlation of compound **2**

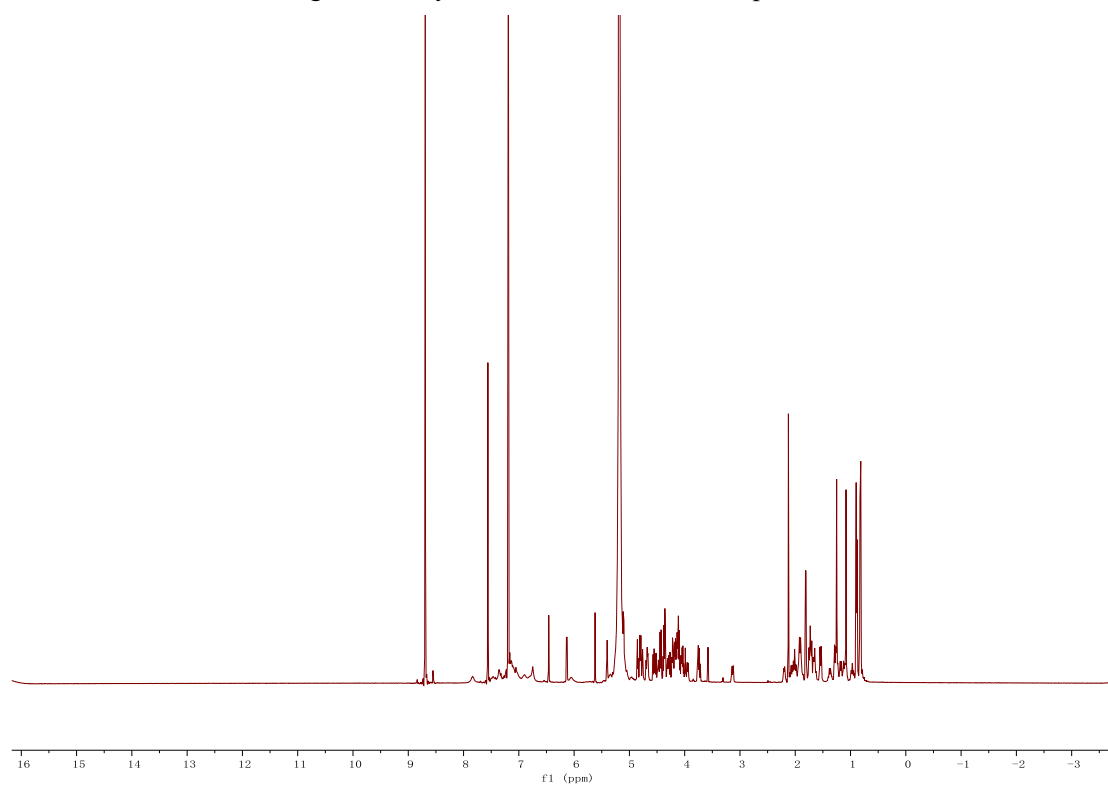

Figure S8  $^1\text{H}$  NMR spectrum of compound **2** (600 MHz,  $\text{pyridine-}d_5$ )

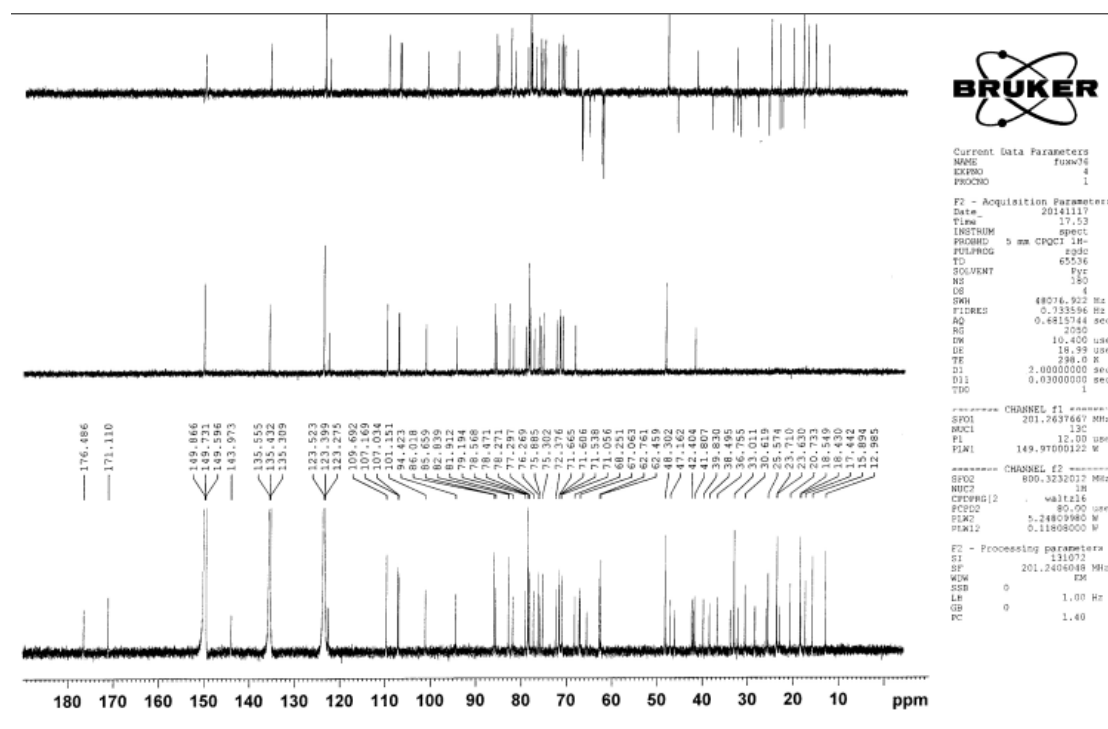

Figure S9  $^{13}\text{C}$  NMR spectrum of compound **2** (150 MHz, pyridine- $d_5$ )

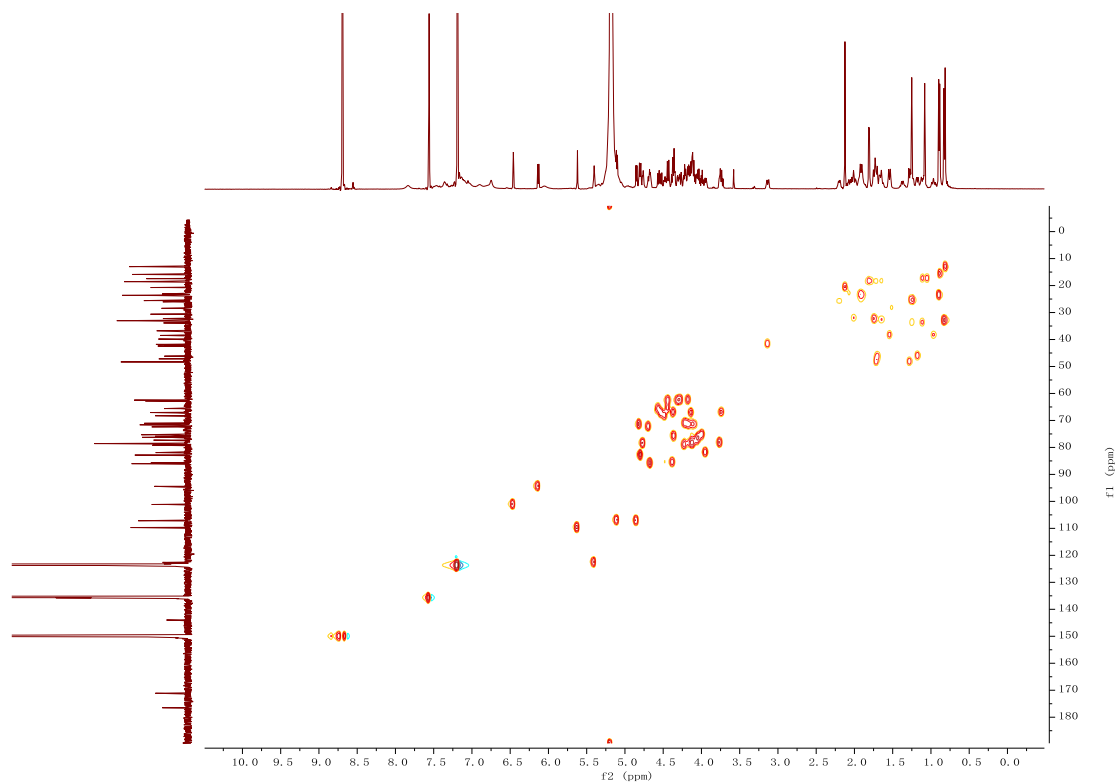

Figure S10 HSQC spectrum of compound **2**

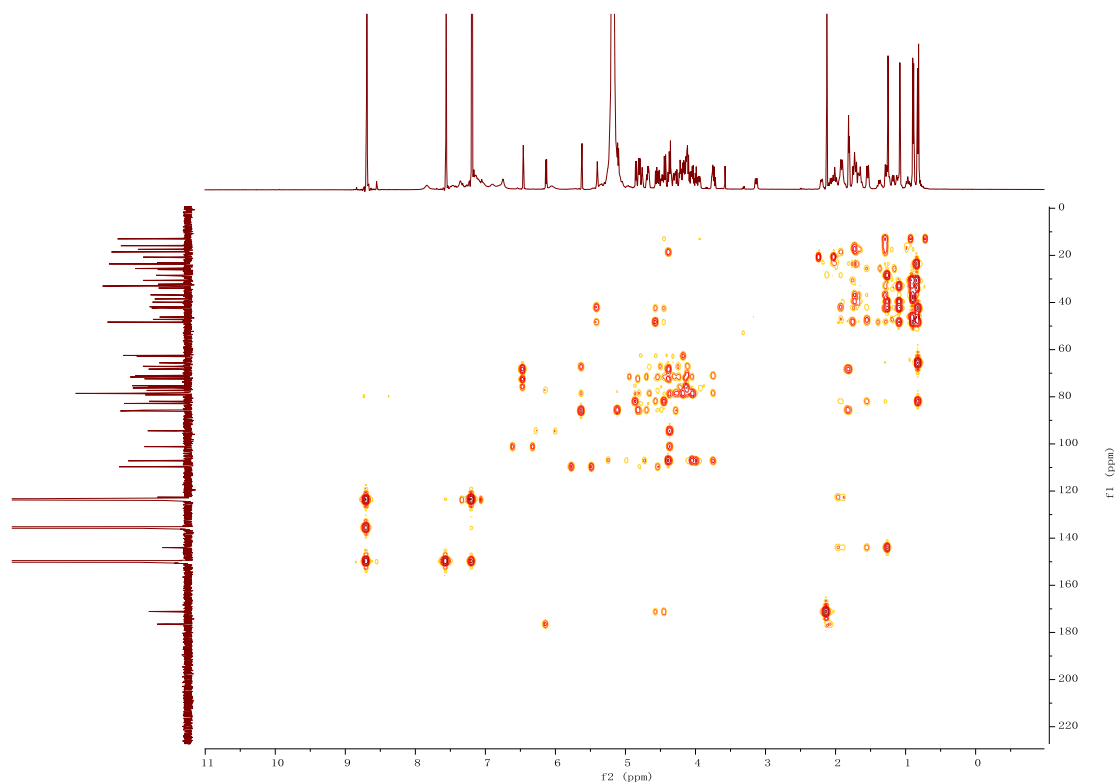

Figure S11 HMBC spectrum of compound **2**

### Qualitative Analysis Report

|                        |                             |               |                      |
|------------------------|-----------------------------|---------------|----------------------|
| Data Filename          | fluxw36.d                   | Sample Name   | fluxw36              |
| Sample Type            | Sample                      | Position      | P1-A7                |
| Instrument Name        | Instrument 1                | User Name     |                      |
| Acq Method             | SIBU-ESI-Lm                 | Acquired Time | 9/22/2015 3:56:44 PM |
| IRM Calibration Status | Success                     | DA Method     | ESI+.m               |
| Comment                |                             |               |                      |
| Sample Group           |                             | Info.         |                      |
| Acquisition SW         | 6200 series TOF/6500 series |               |                      |
| Version                | Q-TOF B.05.01 (B5125.2)     |               |                      |

### User Spectra

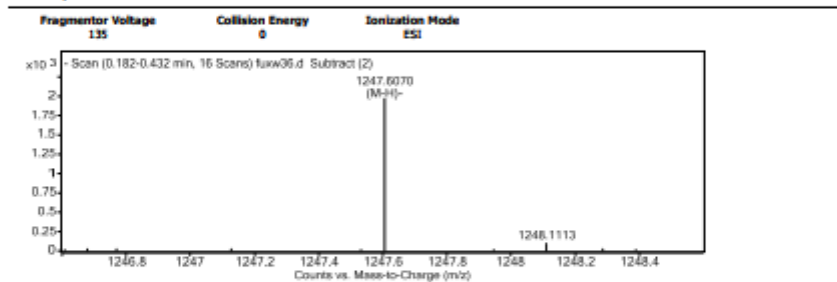

#### Peak List

| m/z       | z | Abund   | Formula     | Ion    |
|-----------|---|---------|-------------|--------|
| 623.2991  | 2 | 1121.34 |             |        |
| 646.3021  | 2 | 1139.5  |             |        |
| 646.805   | 2 | 870.68  |             |        |
| 1247.607  | 1 | 1958.22 | C60 H96 O27 | [M-H]- |
| 1248.608  | 1 | 1383.56 | C60 H96 O27 | [M-H]- |
| 1293.6099 | 1 | 913.5   |             |        |
| 1361.5953 | 1 | 1281.46 |             |        |
| 1362.5957 | 1 | 773.62  |             |        |

#### Formula Calculator Element Limits

| Element | Min | Max |
|---------|-----|-----|
| C       | 3   | 60  |
| H       | 0   | 120 |
| O       | 0   | 60  |

#### Formula Calculator Results

| Formula     | Calculated Mass | Calculated Mz | Mz        | Diff. (mDa) | Diff. (ppm) | DBE     |
|-------------|-----------------|---------------|-----------|-------------|-------------|---------|
| C60 H96 O27 | 1248.6139       | 1247.6066     | 1247.6070 | 0.8         | 0.6         | 13.0000 |

--- End Of Report ---



Figure S12 HRESIMS spectrum of compound **2**

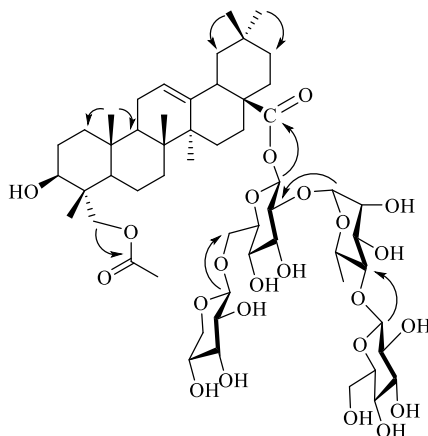

Figure S13 Key HMBC correlation of compound **3**

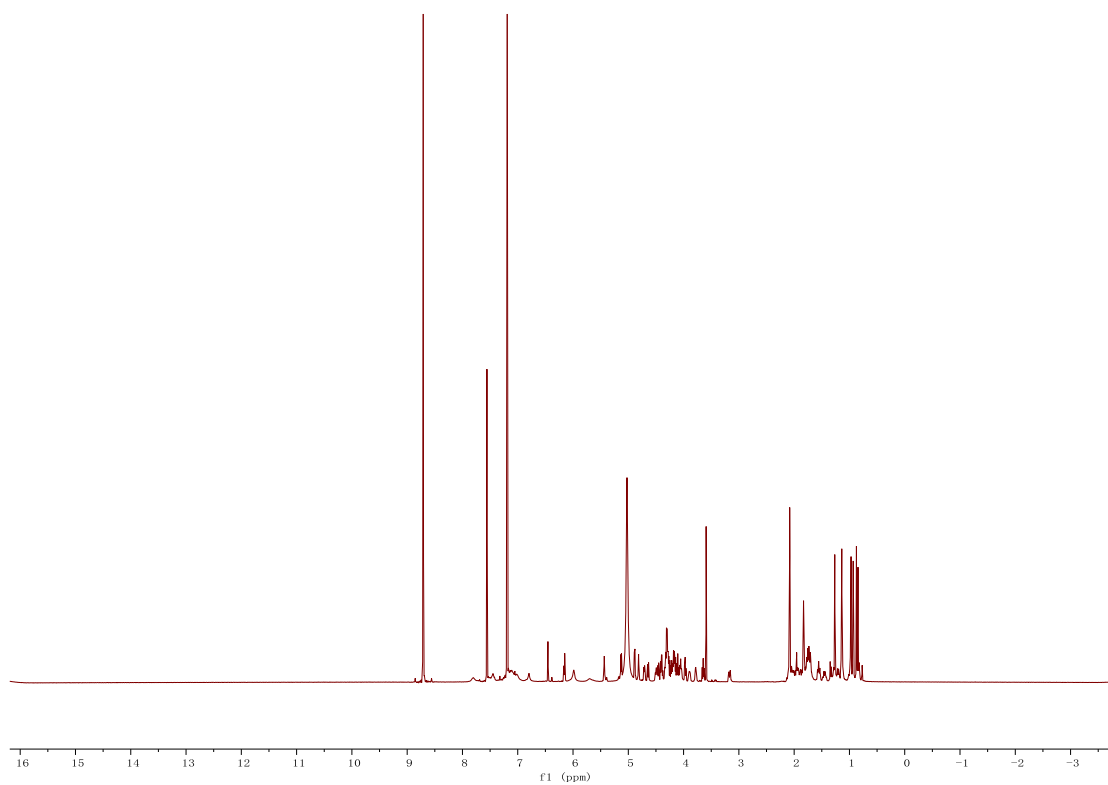

Figure S14 <sup>1</sup>H NMR spectrum of compound **3** (600 MHz, pyridine-*d*<sub>5</sub>)

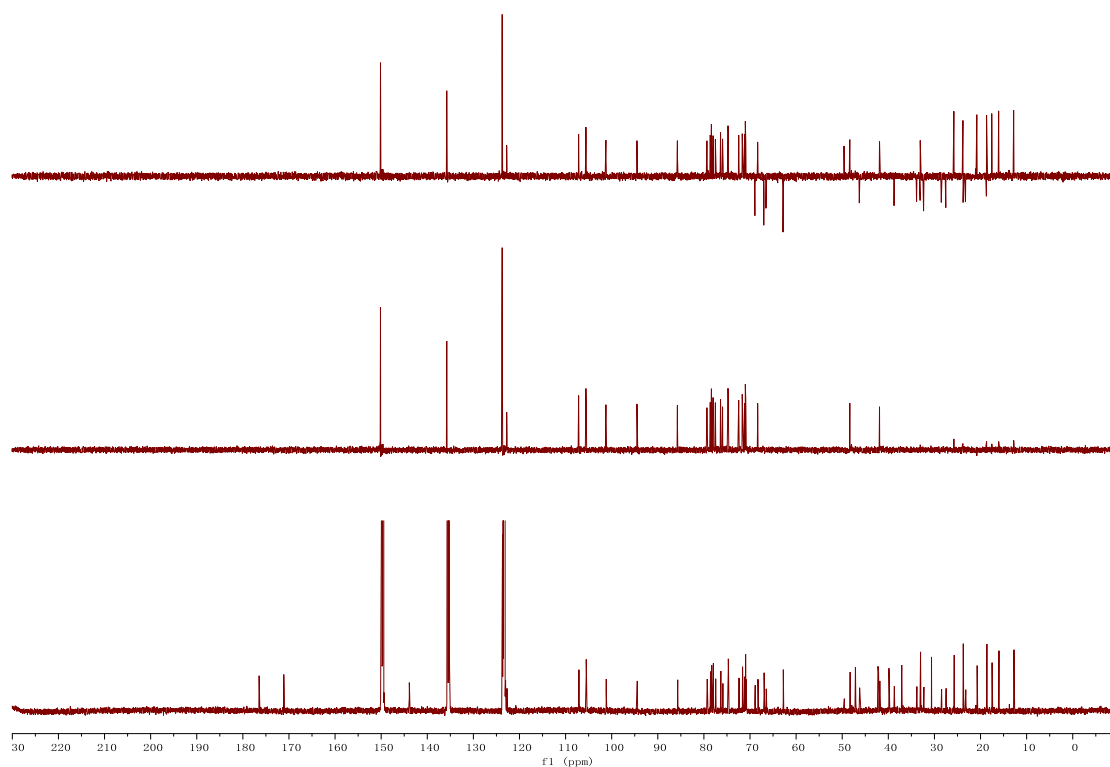

Figure S15  $^{13}\text{C}$  NMR spectrum of compound **3** (150 MHz, pyridine- $d_5$ )

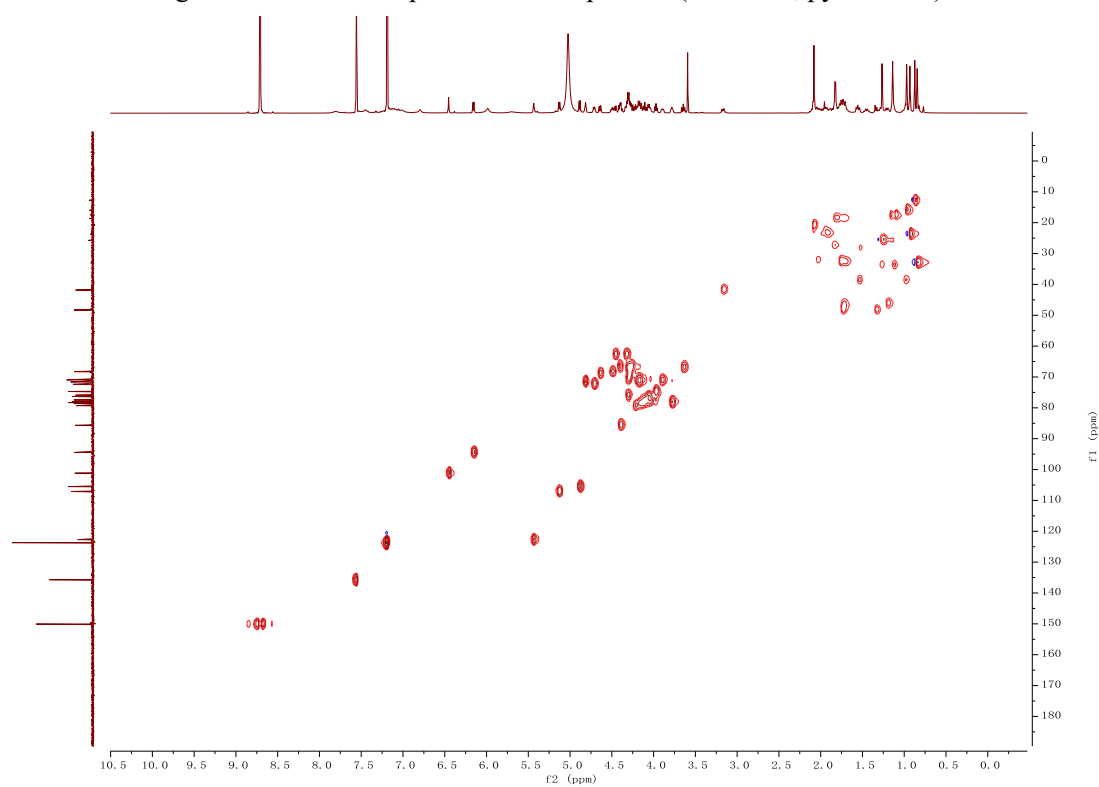

Figure S16 HSQC spectrum of compound **3**

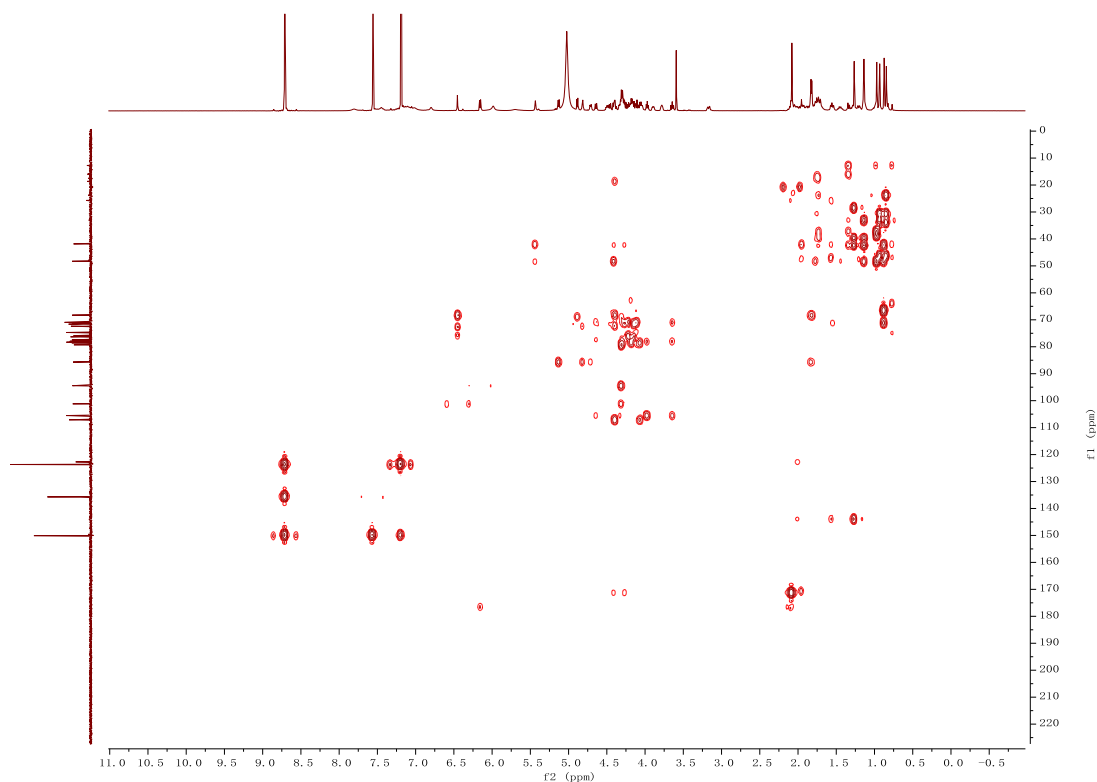

Figure S17 HMBC spectrum of compound **3**

### Qualitative Analysis Report

|                        |                             |               |                       |
|------------------------|-----------------------------|---------------|-----------------------|
| Data Filename          | fluxw43+.d                  | Sample Name   | fluxw43               |
| Sample Type            | Sample                      | Position      | P1-D6                 |
| Instrument Name        | Instrument 1                | User Name     |                       |
| Acq Method             | SIBU.m                      | Acquired Time | 11/5/2015 10:23:27 AM |
| IRM Calibration Status | Success                     | DA Method     | ESI+.m                |
| Comment                |                             |               |                       |
| Sample Group           | Info.                       |               |                       |
| Acquisition SW         | 6200 series TOF/6500 series |               |                       |
| Version                | Q-TOF B.05.01 (B5125.2)     |               |                       |

### User Spectra

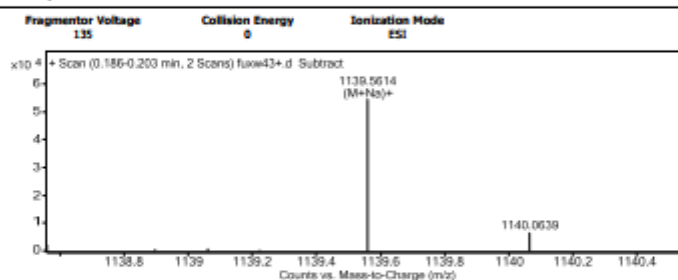

#### Peak List

| m/z       | z | Abund    | Formula     | Ion     |
|-----------|---|----------|-------------|---------|
| 570.2806  | 2 | 11468.18 |             |         |
| 578.2691  | 2 | 33672.49 |             |         |
| 578.7708  | 2 | 21226.05 |             |         |
| 1139.5614 | 1 | 54369.45 | CS5 H88 O23 | (M+Na)+ |
| 1140.565  | 1 | 32070.97 | CS5 H88 O23 | (M+Na)+ |
| 1141.5679 | 1 | 11161.86 | CS5 H88 O23 | (M+Na)+ |
| 1155.5347 | 1 | 15864.92 |             |         |
| 1156.5377 | 1 | 9860.31  |             |         |

#### Formula Calculator Element Limits

| Element | Min | Max |
|---------|-----|-----|
| C       | 3   | 60  |
| H       | 0   | 120 |
| O       | 0   | 30  |

#### Formula Calculator Results

| Formula     | CalculatedMass | CalculatedMz | Mz        | Diff. (mDa) | Diff. (ppm) | DBE     |
|-------------|----------------|--------------|-----------|-------------|-------------|---------|
| CS5 H88 O23 | 1116.5716      | 1139.5609    | 1139.5614 | -0.5        | -0.4        | 12.0000 |

Figure S18 HRESIMS spectrum of compound **3**

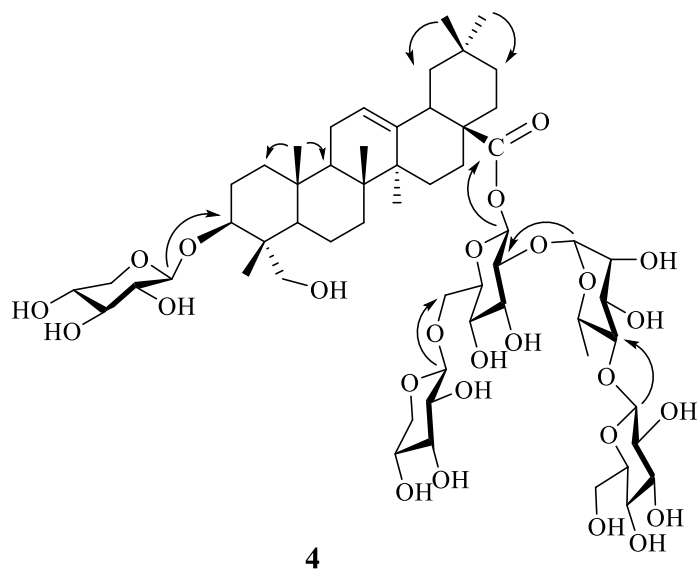

Figure S19 Key HMBC correlation of compound **4**

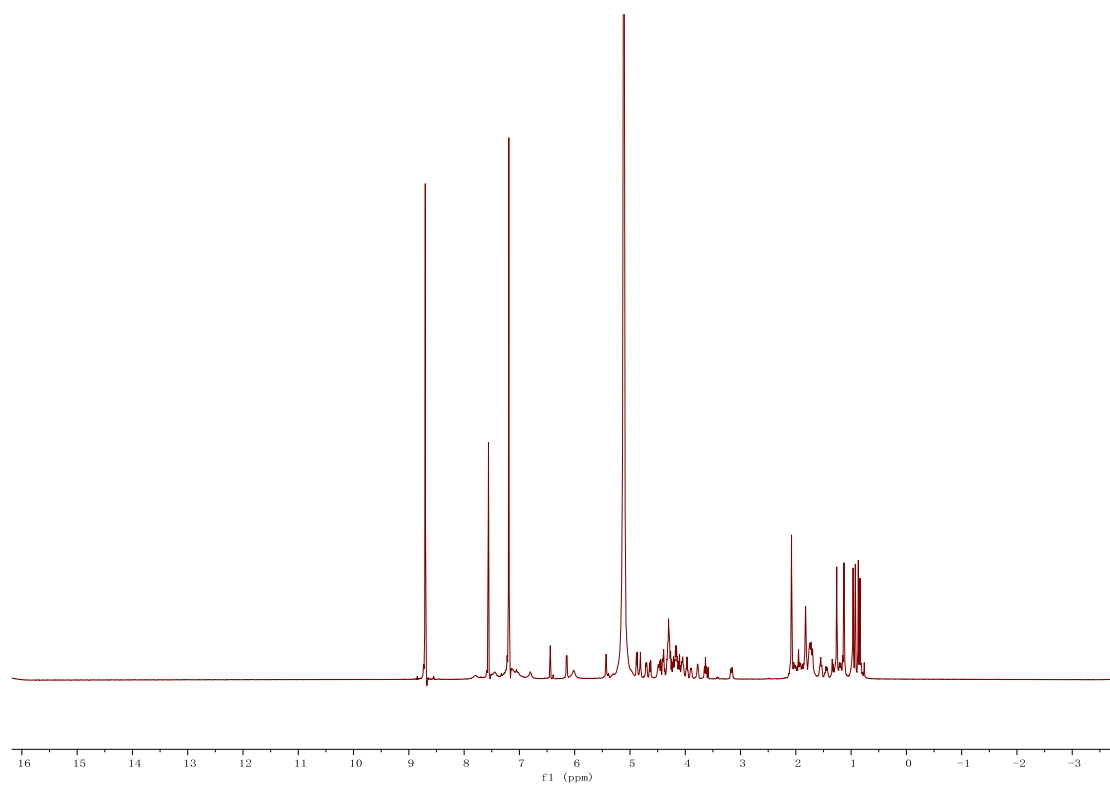

Figure S20 <sup>1</sup>H NMR spectrum of compound **4** (600 MHz, pyridine-*d*<sub>5</sub>)

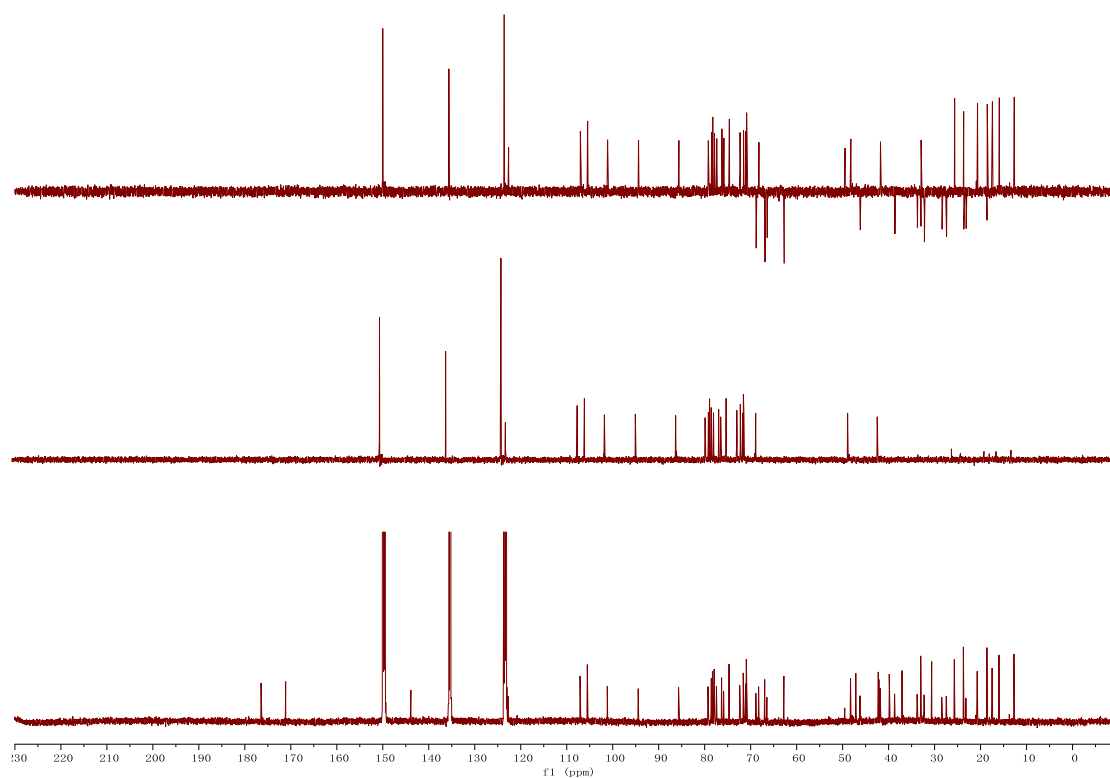

Figure S21  $^{13}\text{C}$  NMR spectrum of compound **4**(150 MHz, pyridine- $d_5$ )

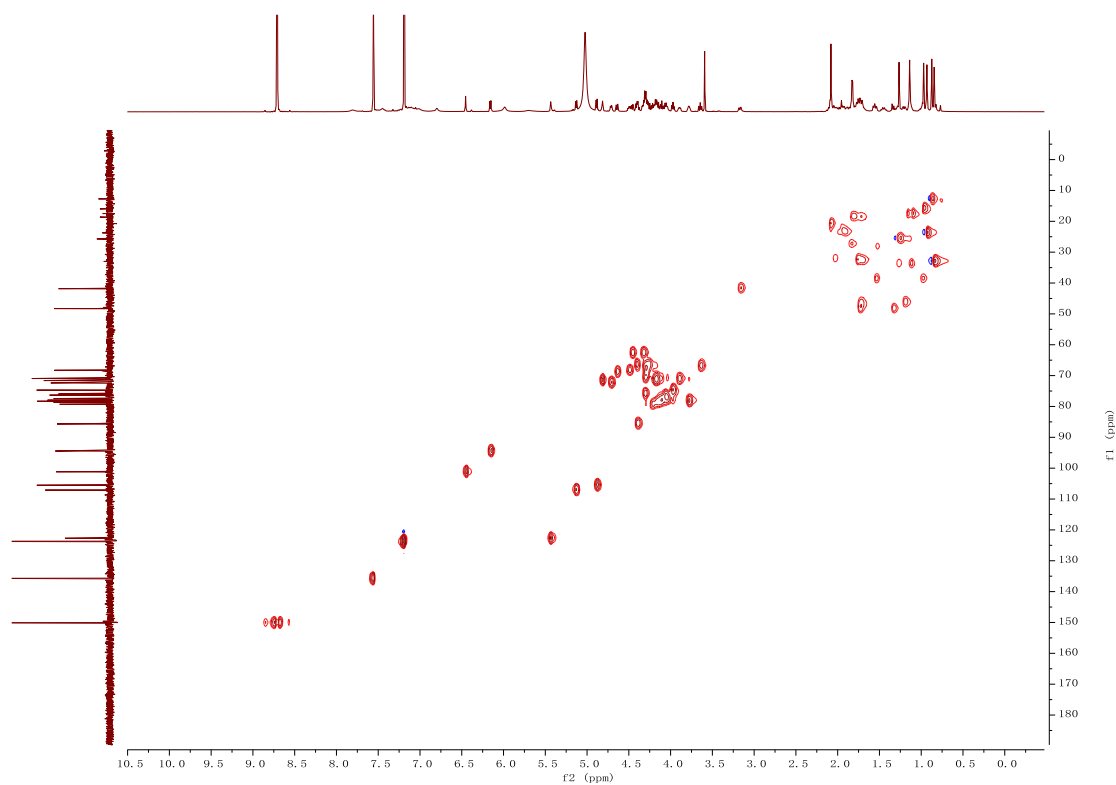

Figure S22 HSQC spectrum of compound **4**

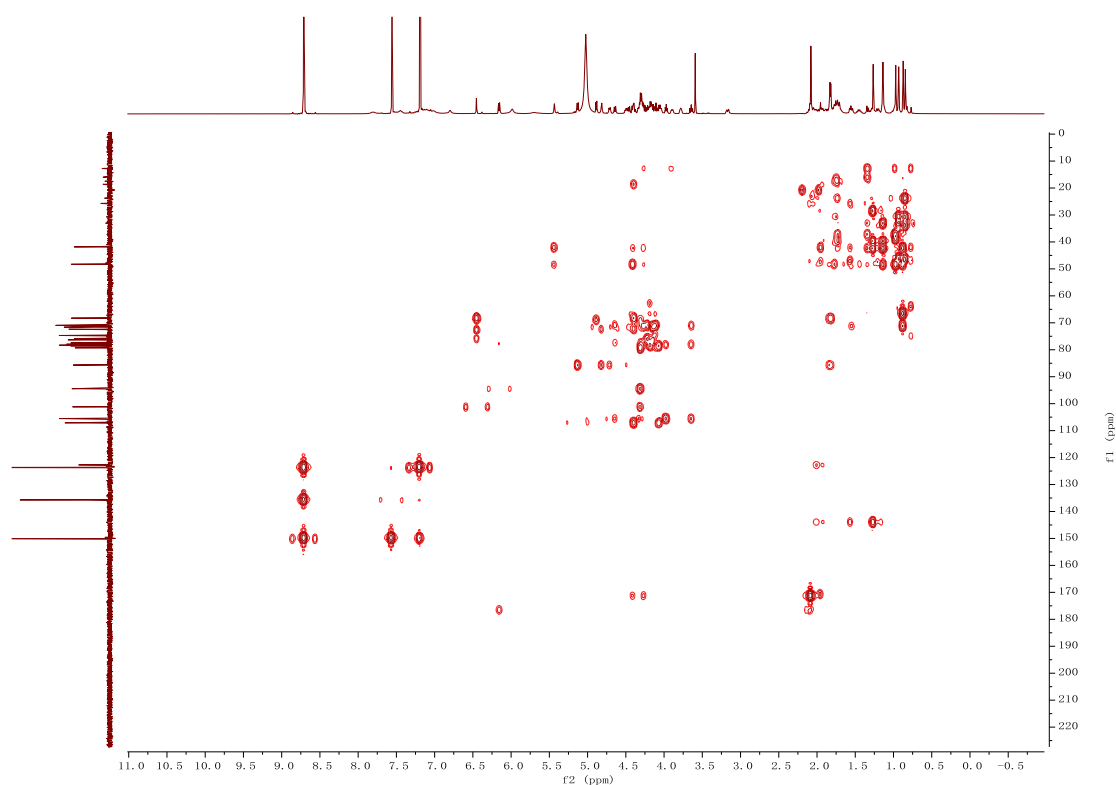

Figure S23 HMBC spectrum of compound **4**

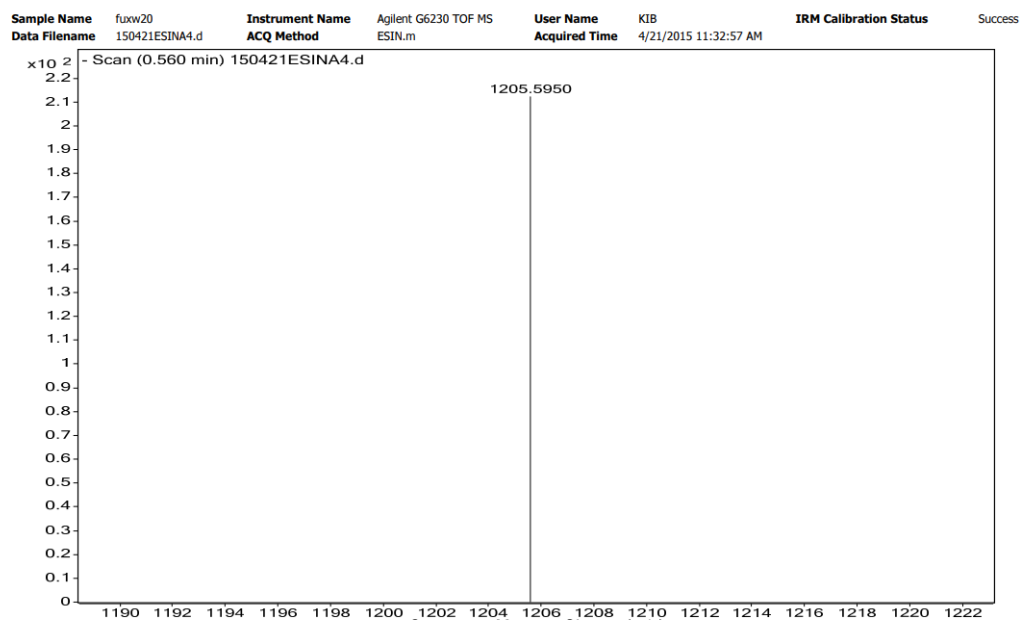

Figure S24 HRESIMS spectrum of compound **4**

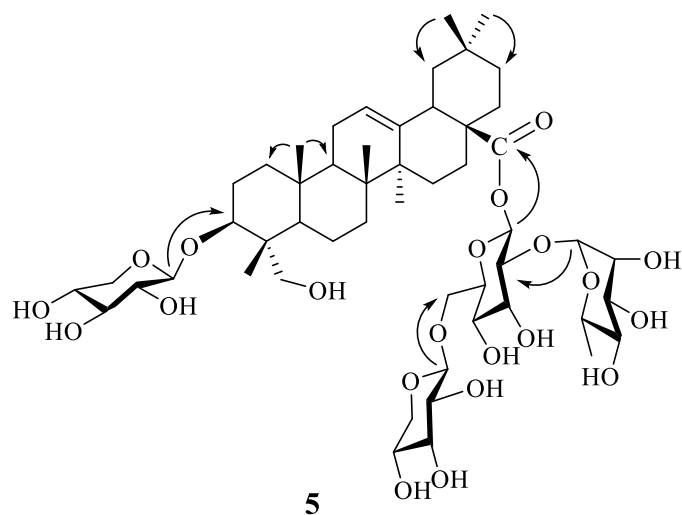

Figure S25 Key HMBC correlation of compound **5**

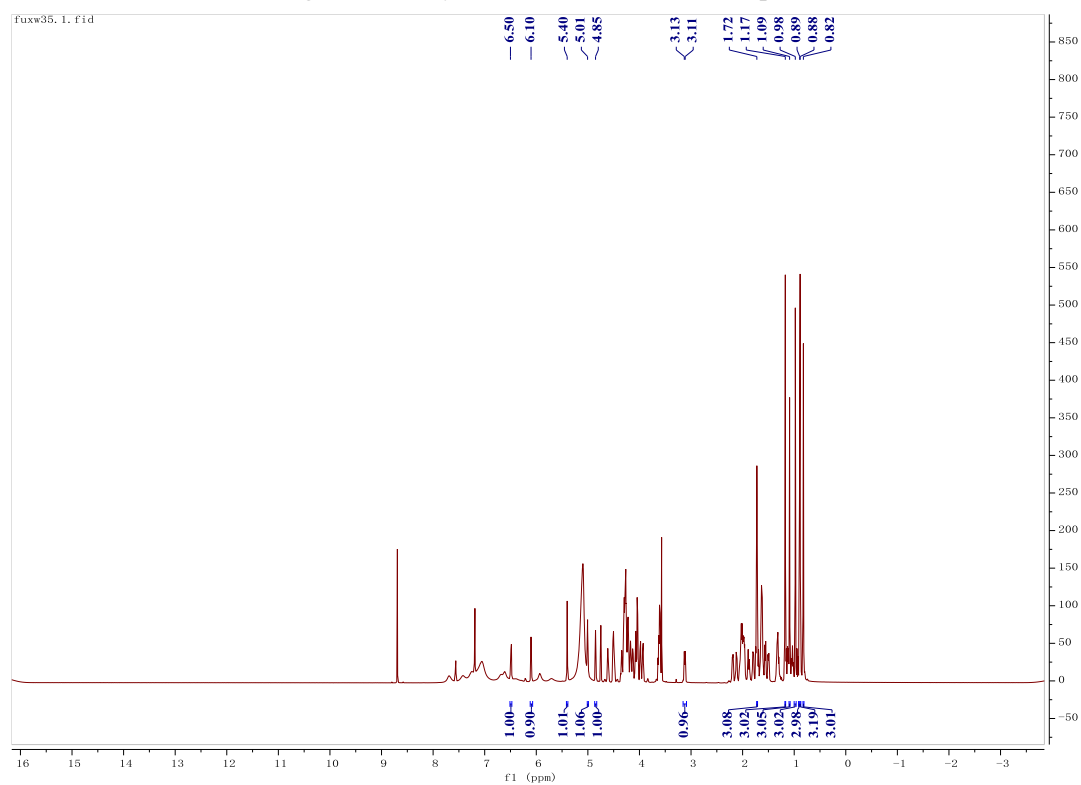

Figure S26  $^1\text{H}$  NMR spectrum of compound **5** (600 MHz, pyridine- $d_5$ )

fuxw35. 6. fid

fuxw35. 8. fid

fuxw35. 4. fid

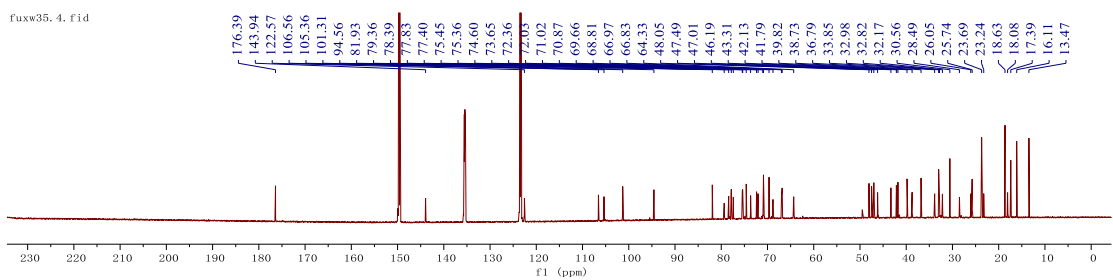

Figure S27  $^{13}\text{C}$  NMR spectrum of compound **5** (150 MHz, pyridine- $d_5$ )

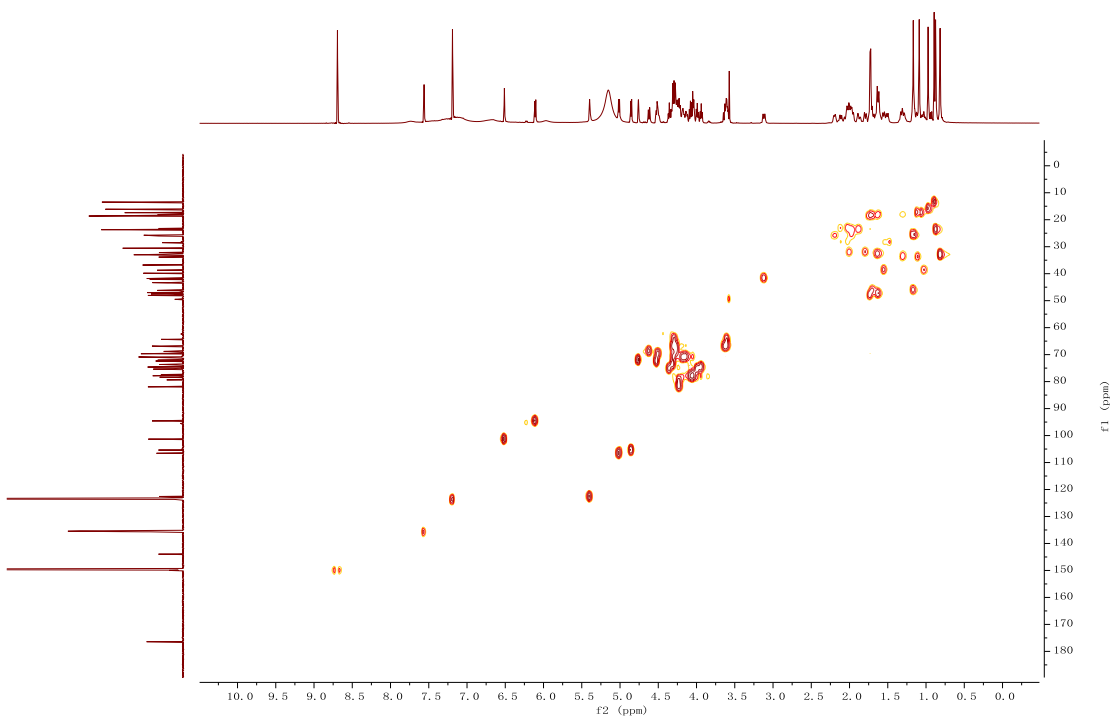

Figure S28 HSQC spectrum of compound **5**



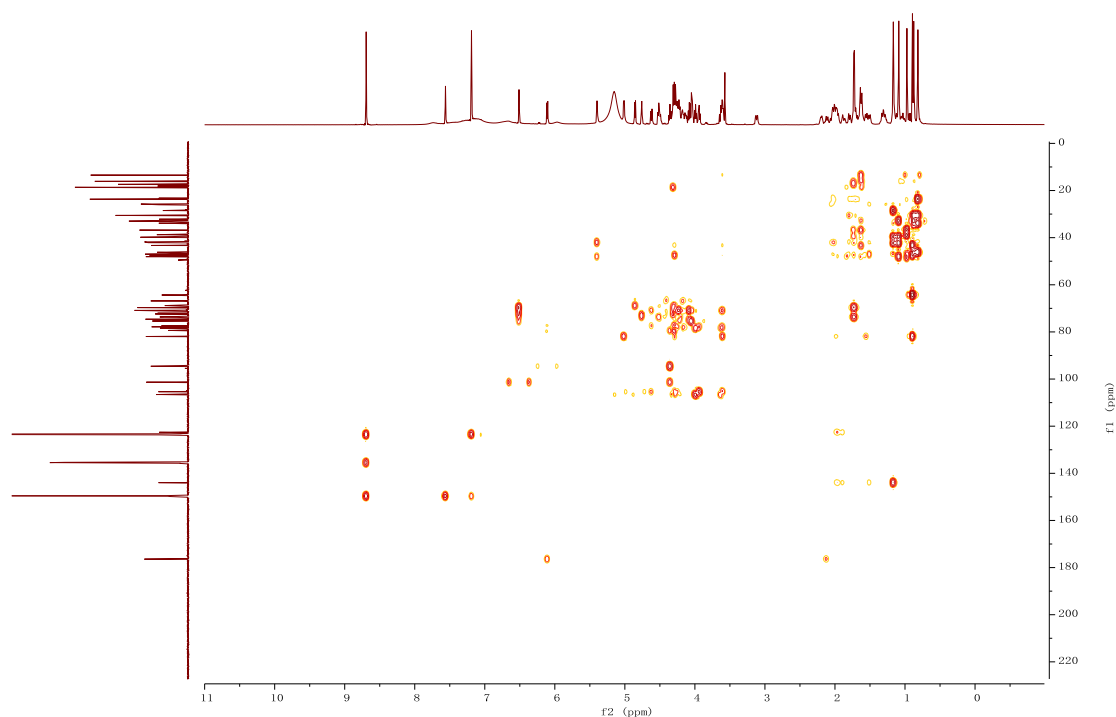

Figure S29 HMBC spectrum of compound **5**

### Qualitative Analysis Report

|                        |                             |               |                      |
|------------------------|-----------------------------|---------------|----------------------|
| Data Filename          | fuwx35.d                    | Sample Name   | fuwx35               |
| Sample Type            | Sample                      | Position      | P1-A6                |
| Instrument Name        | Instrument 1                | User Name     |                      |
| Acq Method             | SIBU-ESI-Lm                 | Acquired Time | 9/22/2015 3:55:13 PM |
| IRM Calibration Status | Success                     | DA Method     | ESI+.m               |
| Comment                |                             |               |                      |
| Sample Group           |                             | Info.         |                      |
| Acquisition SW         | 6200 series TOF/6500 series |               |                      |
| Version                | Q-TOF 8.05.01 (BS125.2)     |               |                      |

### User Spectra

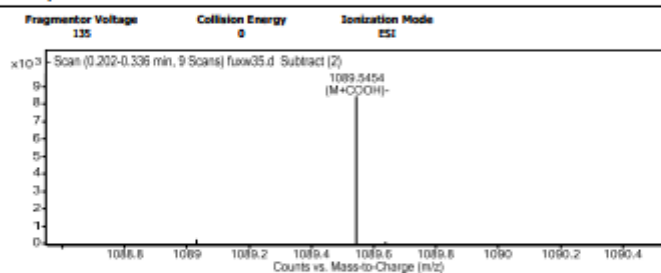

### Peak List

| m/z       | z | Abund    | Formula     | Ion       |
|-----------|---|----------|-------------|-----------|
| 362.9406  | 1 | 5479.9   |             |           |
| 1043.5417 | 2 | 15203.24 |             |           |
| 1044.546  | 2 | 8454.5   |             |           |
| 1089.5454 | 1 | 8421.02  | C52 H84 O21 | (M+COOH)- |
| 1090.5505 | 1 | 5362.31  | C52 H84 O21 | (M+COOH)- |
| 1106.5393 | 1 | 6732.35  |             |           |
| 1157.5343 | 1 | 13300.13 |             |           |
| 1158.5396 | 1 | 7422.3   |             |           |

### Formula Calculator Element Limits

| Element | Min | Max |
|---------|-----|-----|
| C       | 3   | 60  |
| H       | 0   | 120 |
| O       | 0   | 60  |

### Formula Calculator Results

| Formula     | CalculatedMass | CalculatedMz | Mz        | Diff. (mDa) | Diff. (ppm) | DBE     |
|-------------|----------------|--------------|-----------|-------------|-------------|---------|
| C52 H84 O21 | 1044.5505      | 1089.5487    | 1089.5454 | 2.1         | 2.0         | 11.0000 |

Figure S30 HRESIMS spectrum of compound **5**

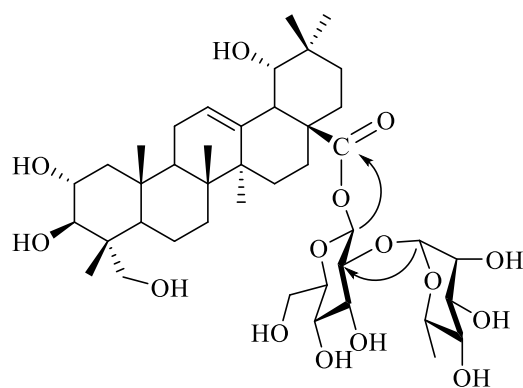

Figure S31 Key HMBC correlation of compound **6**

fuya19\_1.fid

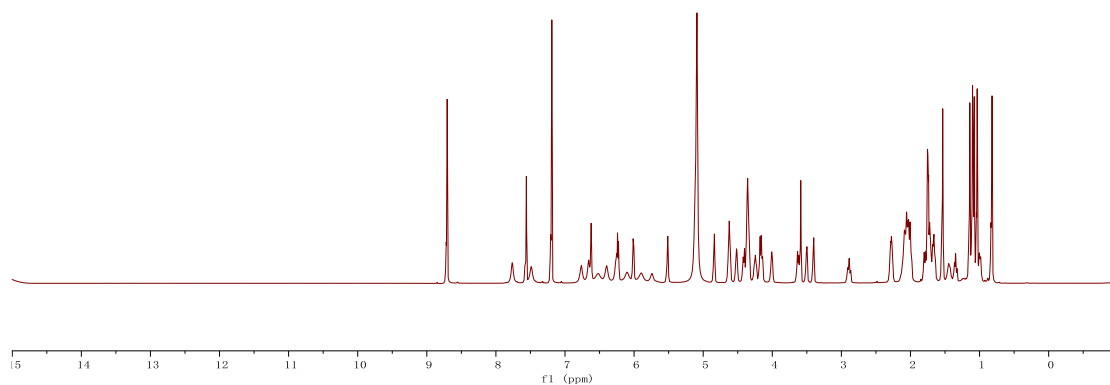

Figure S32 <sup>1</sup>H NMR spectrum of compound **6** (600 MHz, pyridine-*d*<sub>5</sub>)

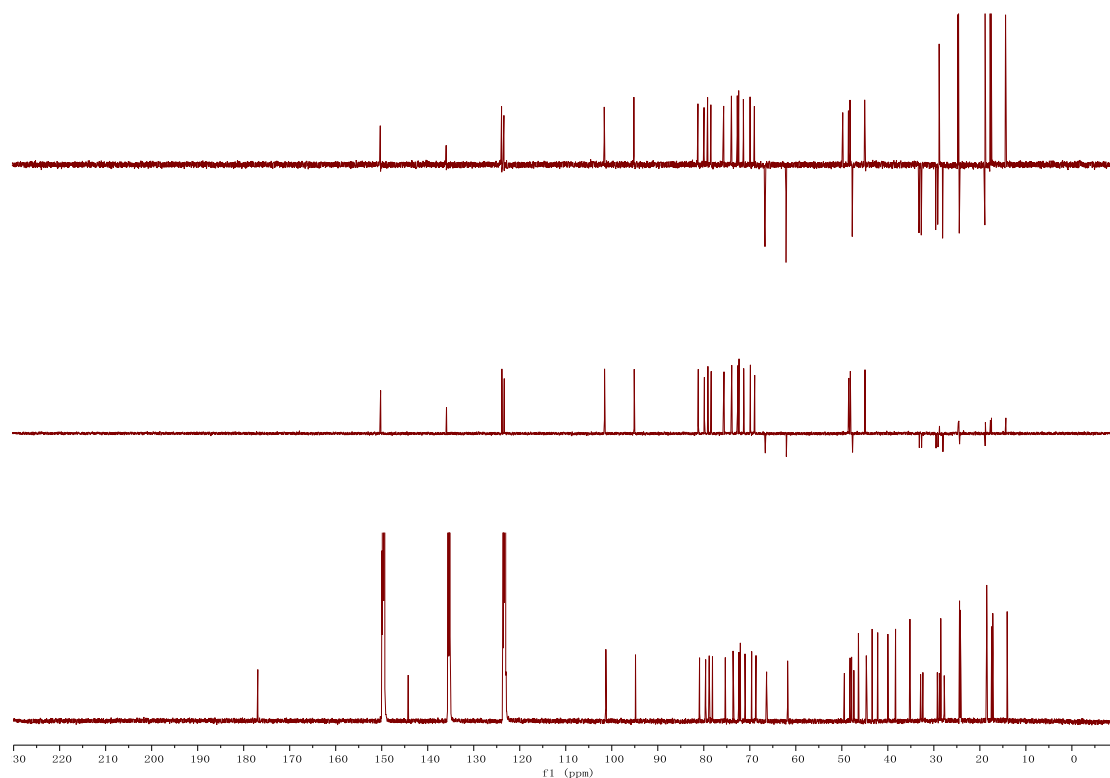

Figure S33  $^{13}\text{C}$  NMR spectrum of compound **6** (150 MHz,  $\text{pyridine-}d_5$ )

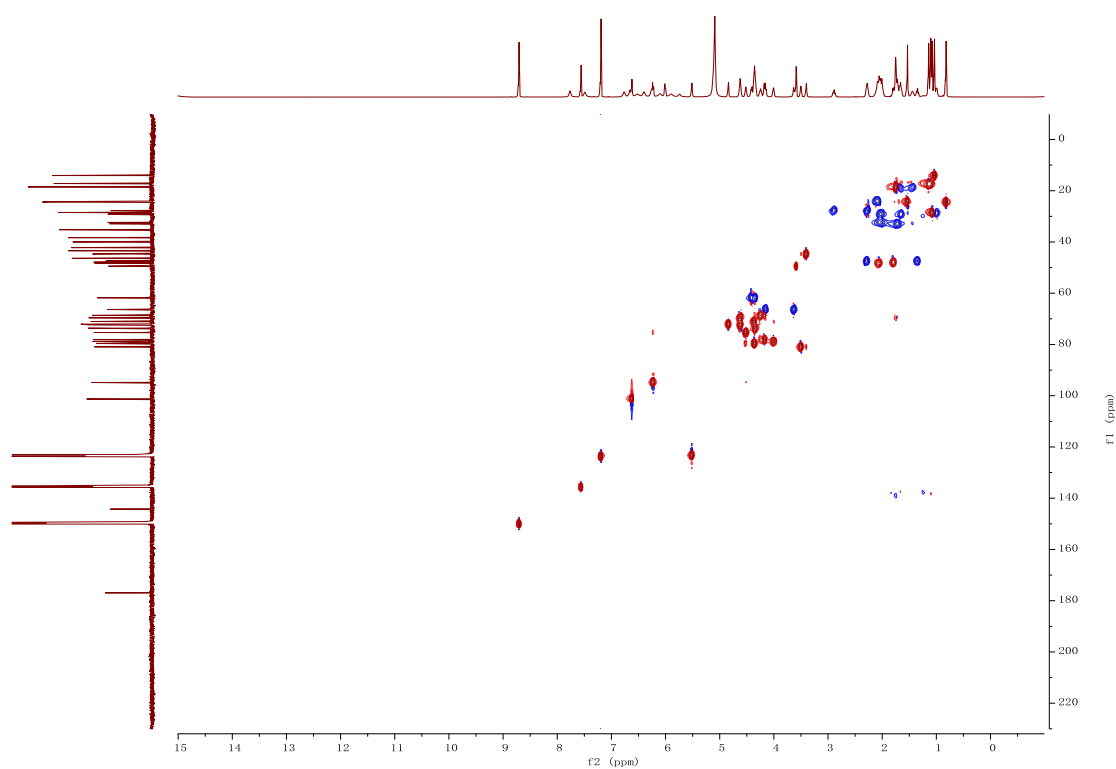

Figure S34 HSQC spectrum of compound **6**

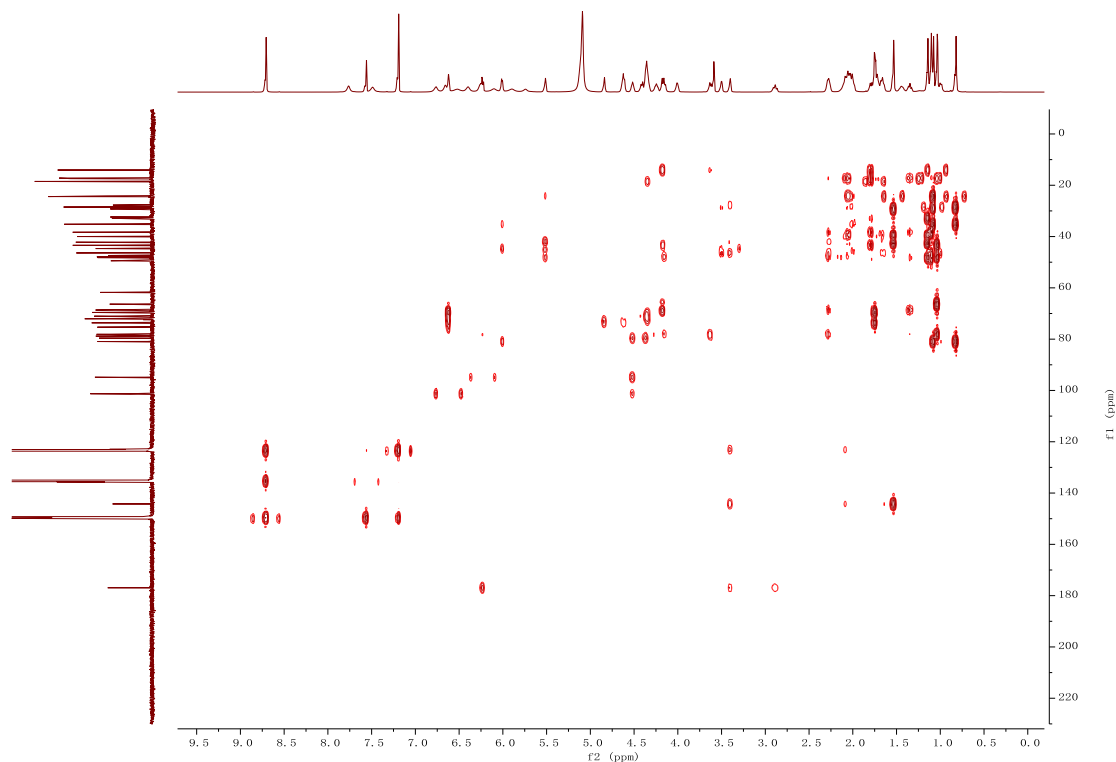

Figure S35 HMBC spectrum of compound **6**

### Qualitative Analysis Report

|                        |                             |               |                       |
|------------------------|-----------------------------|---------------|-----------------------|
| Data Filename          | fuya19.d                    | Sample Name   | fuya19                |
| Sample Type            | Sample                      | Position      | P1-C1                 |
| Instrument Name        | Instrument 1                | User Name     |                       |
| Acq Method             | s.m                         | Acquired Time | 7/30/2019 11:49:39 AM |
| IRM Calibration Status | Success                     | DA Method     | Default.m             |
| Comment                |                             |               |                       |
| Sample Group           |                             | Info.         |                       |
| Acquisition SW         | 6300 series TOF/6500 series |               |                       |
| Version                | Q-TOF 8.05.01 (85125.2)     |               |                       |

### User Spectra

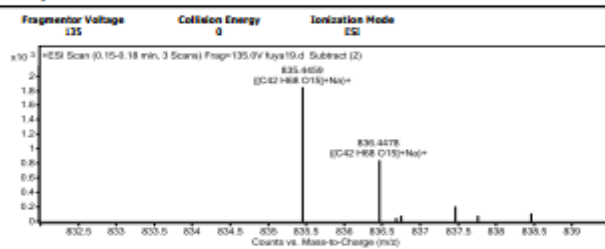

| Peak List | m/z      | z | Abund   | Formula     | Ion     |
|-----------|----------|---|---------|-------------|---------|
|           | 100.1277 | 1 | 4945.02 |             |         |
|           | 104.107  |   | 1894.2  |             |         |
|           | 353.2642 | 1 | 1477.43 |             |         |
|           | 369.2396 |   | 2653.37 |             |         |
|           | 381.2961 | 1 | 1377.17 |             |         |
|           | 397.2715 | 1 | 2374.74 |             |         |
|           | 453.1668 | 1 | 1293.8  |             |         |
|           | 575.3535 | 1 | 1042.65 |             |         |
|           | 835.4459 | 1 | 1856.69 | C42 H68 O15 | (H+Na)+ |
|           | 836.4478 | 1 | 858.99  | C42 H68 O15 | (H+Na)+ |

#### Formula Calculator Element Limits

| Element | Min | Max |
|---------|-----|-----|
| C       | 3   | 120 |
| H       | 0   | 240 |
| O       | 0   | 30  |

#### Formula Calculator Results

| Formula     | CalculatedMass | CalculatedHz | H/z      | Diff. (mDa) | Diff. (ppm) | DBE    |
|-------------|----------------|--------------|----------|-------------|-------------|--------|
| C42 H68 O15 | 812.4558       | 835.4450     | 835.4459 | -0.90       | -1.08       | 9.0000 |

--- End Of Report ---

Figure S36 HRESIMS spectrum of compound **6**

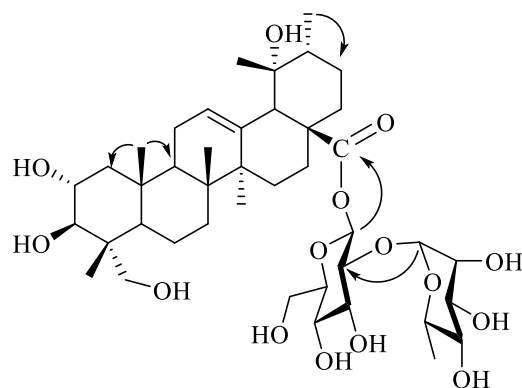

Figure S37 Key HMBC correlation of compound **7**

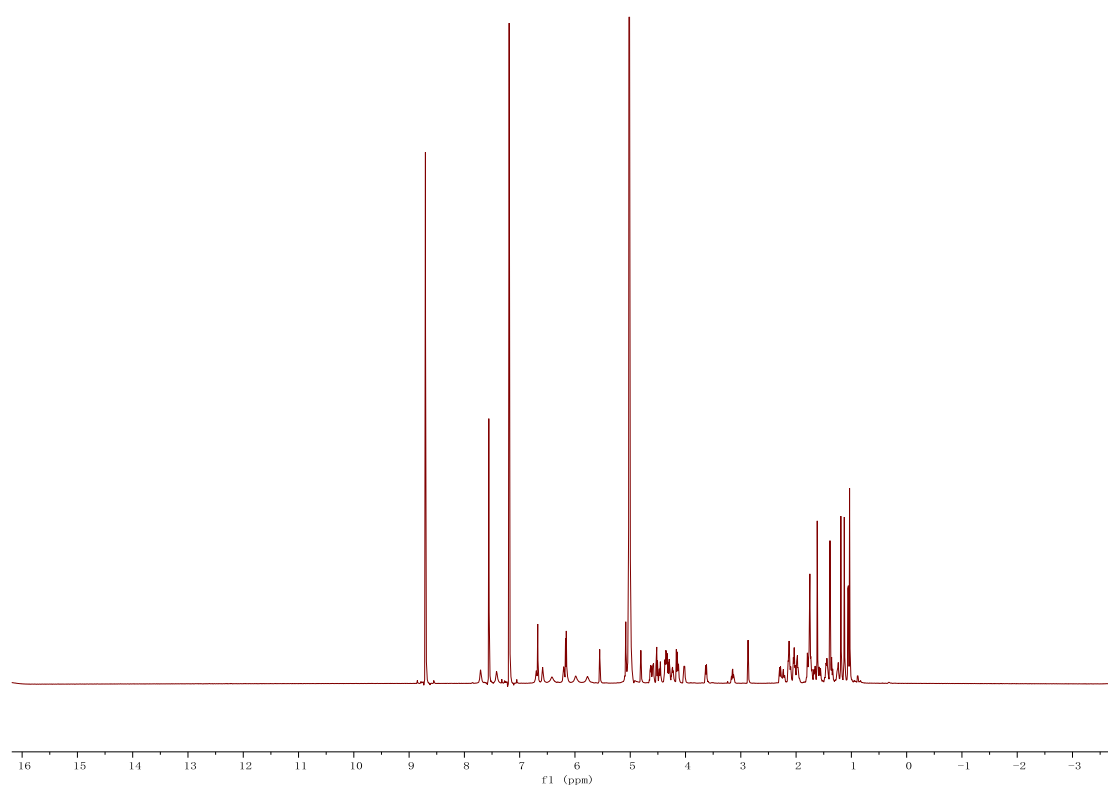

Figure S38  $^1\text{H}$  NMR spectrum of compound **7** (600 MHz, pyridine- $d_5$ )

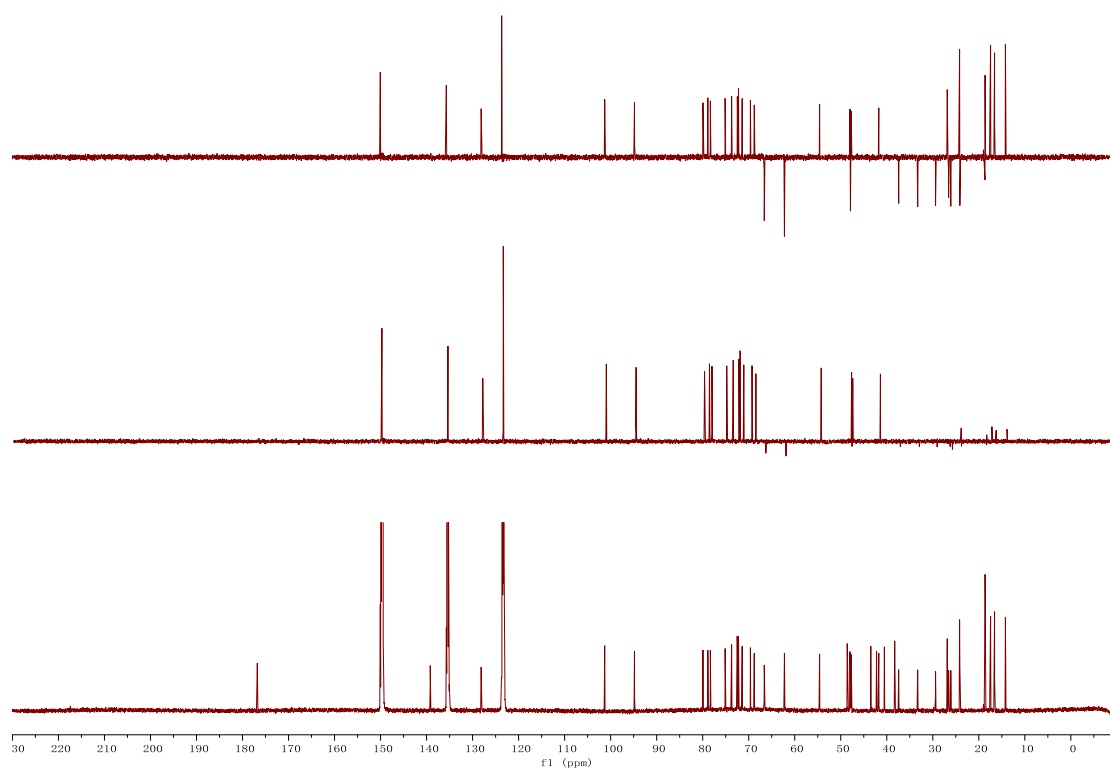

Figure S39  $^{13}\text{C}$  NMR spectrum of compound **7**(150 MHz,  $\text{pyridine-}d_5$ )

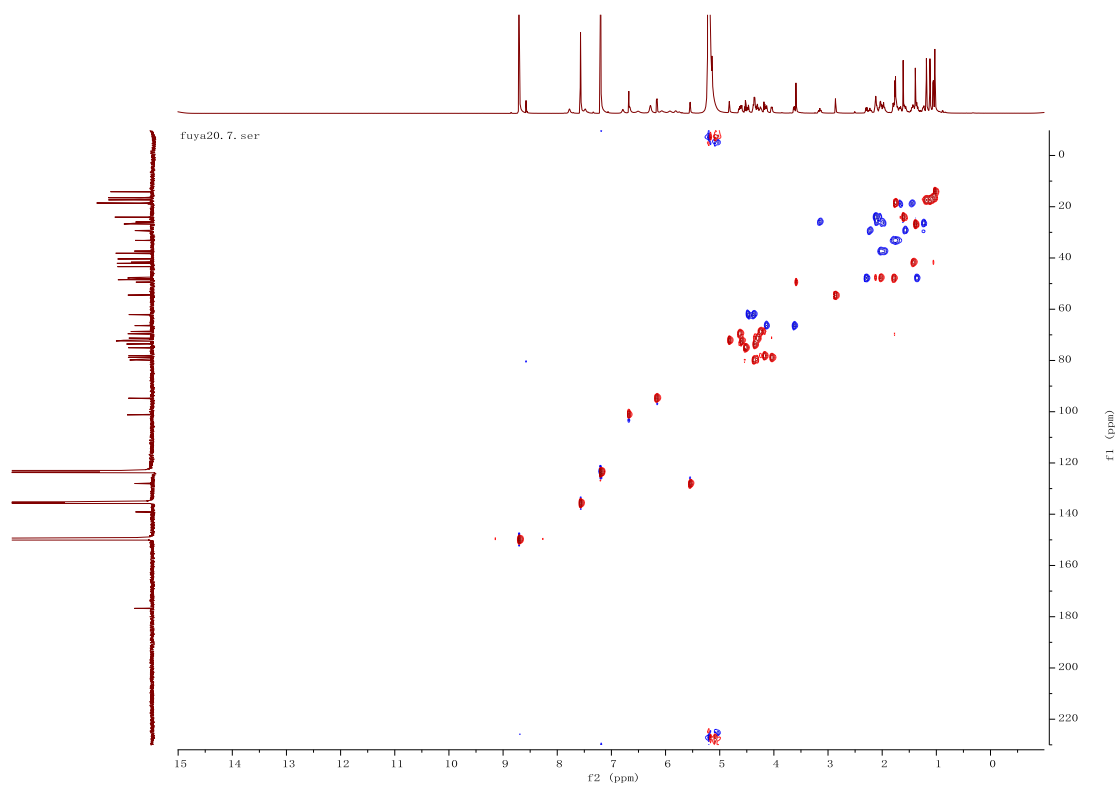

Figure S40 HSQC spectrum of compound **7**

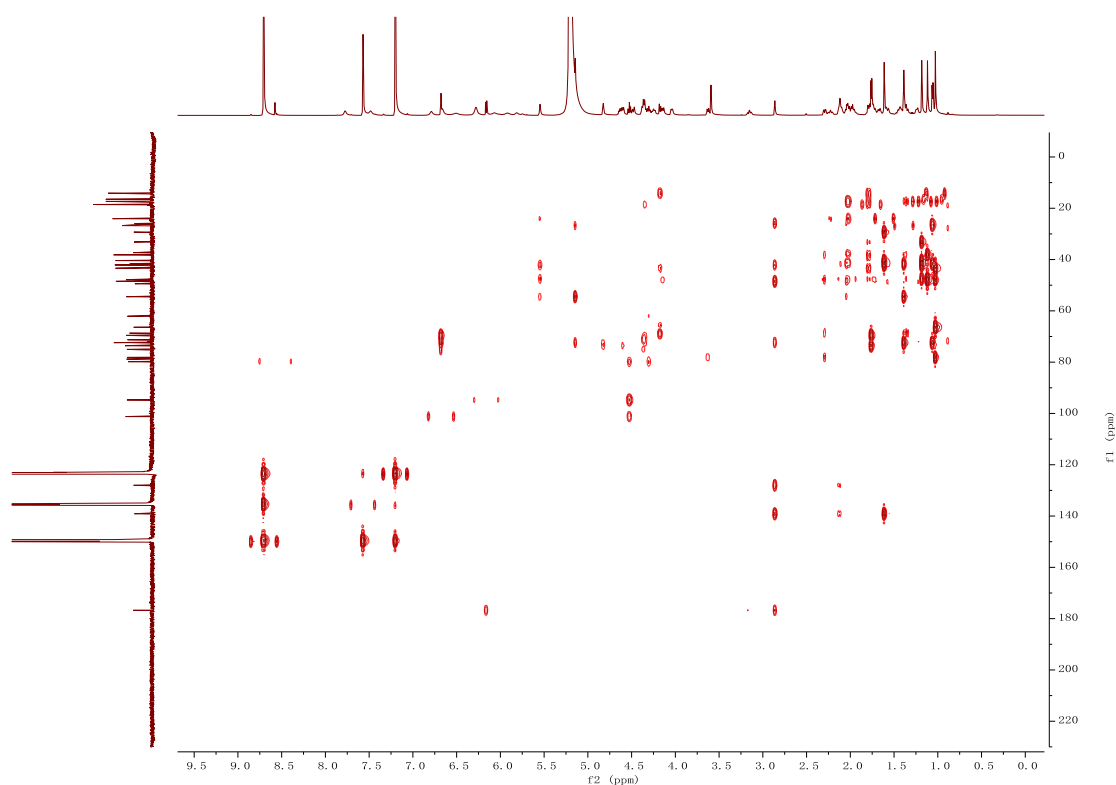

Figure S41 HMBC spectrum of compound **7**

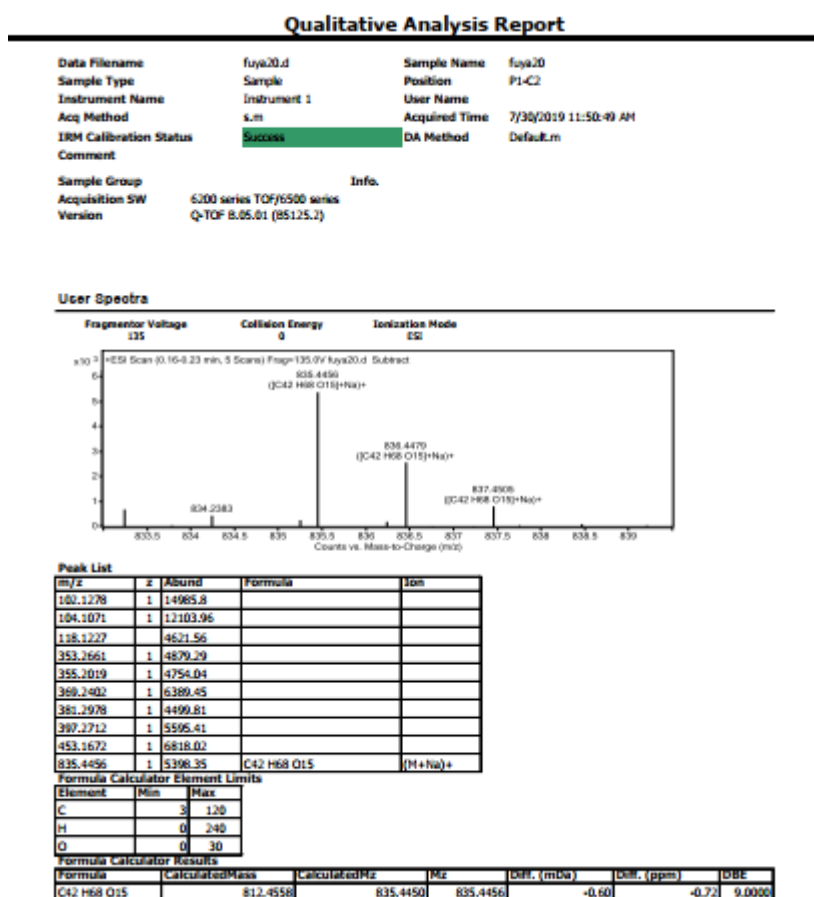

Figure S42 HRESIMS spectrum of compound **7**
